# Supplementary material for: Oncometabolite L‐2‐hydroxyglurate directly induces vasculogenic mimicry through PHLDB2 in renal cell carcinoma
Source: PubMed Central journal article supplement (PMC7986127; doi:10.1002/ijc.33435), 2021-01-15
Supplement: IJC-148-1743-s001.pdf [file IJC-148-1743-s001.pdf]

1 **Oncometabolite L-2-Hydroxyglurate Directly Induces Vasculogenic Mimicry**  
2 **Through PHLDB2 in Renal Cell Carcinoma**

3

4 Huan Wang, Liya Wang, Qiming Zheng, Zeyi Lu, Yuanlei Chen, Danyang Shen, Dingwei Xue,  
5 Minxiao Jiang, Lifeng Ding, Jie Zhang, Haiyang Wu, Liqun Xia, Jun Qian, Gonghui Li and  
6 Jieyang Lu

7

8

9 **Table of contents**

10

11 --Supplementary Materials & Methods

12 --Supplementary Tables 1-2

13 --Supplementary Figures 1-4

14

15

16

17

18

19

20

21

22

23

24

25

26

27

28

29

30

31

32

33

34

35

36

37

38

39

40

41

42

43

44

45 **Supplementary Materials and Methods**

46

47 **RNA-seq read mapping**

48 The Illumina reads (150 bp paired end) were mapped to the annotated genome of GRCh37(hg19)  
49 using HISAT2. Approximately 38~55 million 150bp paired-end total read per sample were  
50 obtained. To ensure the quality of information analysis, total reads were trimmed to remove any  
51 remaining adapter sequences or low-quality reads by TrimGalore  
52 ([http://www.bioinformatics.babraham.ac.uk/projects/trim\\_galore/](http://www.bioinformatics.babraham.ac.uk/projects/trim_galore/)). Then the clean reads were  
53 mapped to the annotated genome with parameters. Then FPKM was calculate with the reference  
54 genome by Stringtie strategy for further analysis. Sequencing statistics per sample was showed in  
55 supplementary Table 2.

56

57

58

59

60

61

62

63

64

65

66

67

68

69

70

71

72

73

74

75

76

77

78

79

80

81

82

83

84

85

86

87

88

89 Supplementary Table 1: Patient characteristics from TCGA datasets

90

| Variables  |        | Case number (N=517) or mean (range) |
|------------|--------|-------------------------------------|
| Gender     | Male   | 336                                 |
|            | Female | 181                                 |
| Age(years) |        | 60.64 (34-90)                       |
| Stage      | I      | 266                                 |
|            | II     | 54                                  |
|            | III    | 121                                 |
|            | IV     | 76                                  |

91

92

93

94

95

96

97

98

99

100

101

102

103

104

105

106

107

108

109

110

111

112

113

114

115

116

117

118

119

120

121

122

123

124

125 Supplementary Table 2: RNA-seq statistics

126

| Sample      | Total reads | Clean reads | Mapped reads | Mapped rate (%) |
|-------------|-------------|-------------|--------------|-----------------|
| 786-O       | 56316634    | 55915234    | 54233628     | 96.99           |
| 786-O+L-2HG | 38540642    | 38277802    | 37048773     | 96.79           |
| A-498       | 53859884    | 53471064    | 51840938     | 96.95           |
| A-498+L-2HG | 55105450    | 54698764    | 52972770     | 96.84           |

127

128

129

130

131

132

133

134

135

136

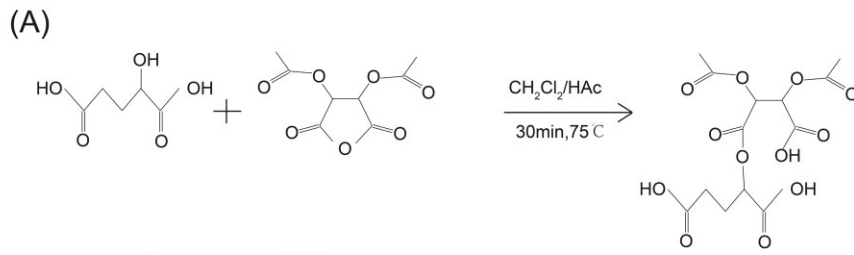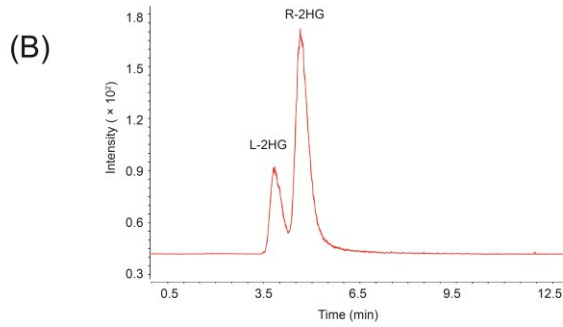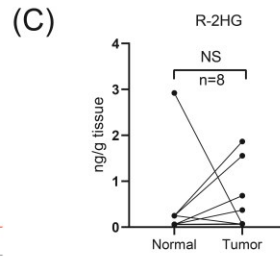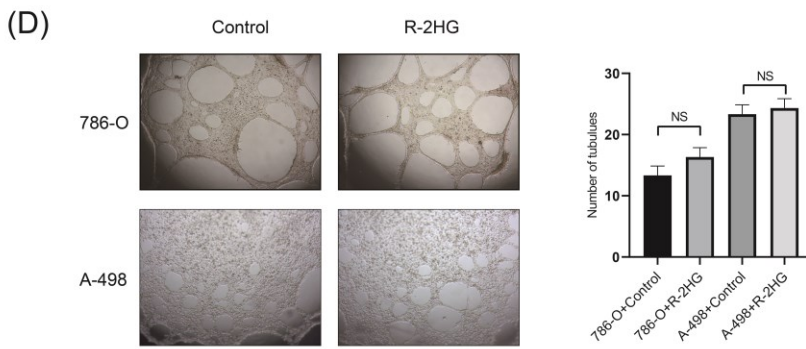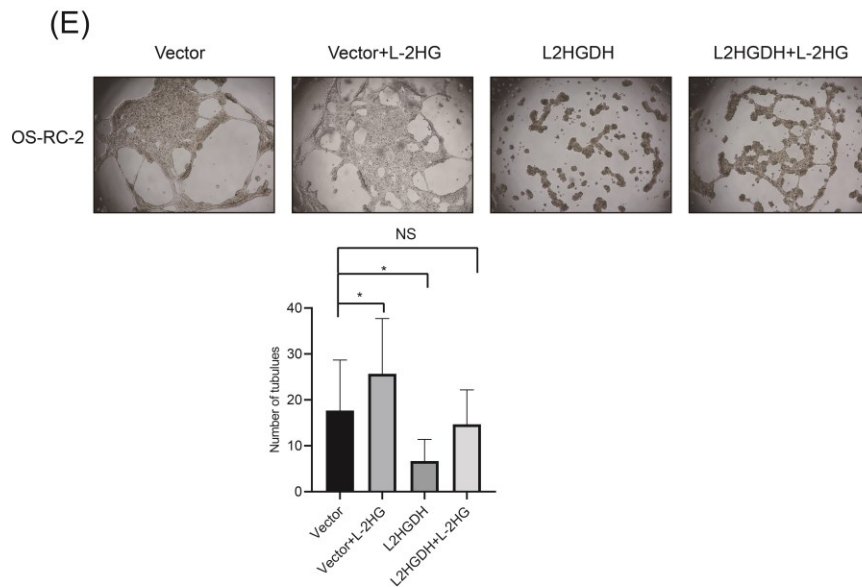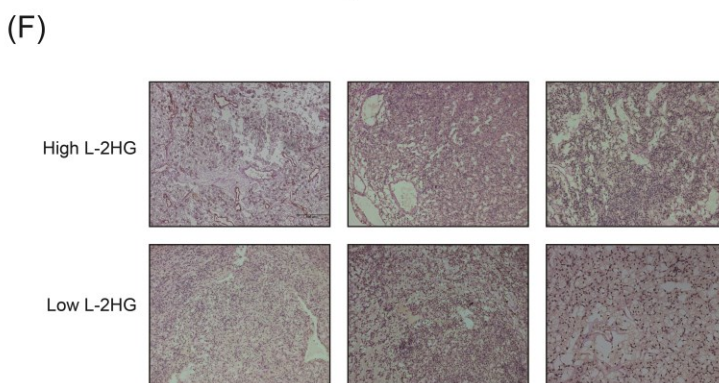

138

139 **Figure S1**

140 (A) Reaction scheme for the derivatization of 2HG. DATAN and 2HG was processed in the CH<sub>2</sub>Cl<sub>2</sub> and  
141 HAc in 75°C for 30min.

142 (B) Standard solutions of L-2HG and R-2HG were analyzed by LC-MS/MS. Two well resolved peaks  
143 for the derivatized L-2HG and derivatized R-2HG were recorded.

144 (C) R-2HG level was measured by LC-MS/MS in the RCC tissues and adjacent normal tissues, n=8  
145 NS= no significant.

146 (D) Images (40X) of VM in 786-O and A-498 cells after R-2HG treatment for 24h. VM tubes were  
147 quantified in the right panel. NS=no significant.

148 (E) Images (40X) of VM in OS-RC-2 cells after L-2HG treatment or L2HGDH plasmid transfection.  
149 Quantification of VM including three kinds of cell lines (786-O, A-498, OS-RC-2) for each  
150 experimental group was presented in the bottom. \*p<0.05, NS=no significant.

151 (F) The presence of VM in tumor tissues (High L-2HG vs Low L-2HG). PAS positive and CD34  
152 negative was considered the VM channel. The quantification data was in the Fig1E.

153

154

155

156

157

158

159

160

161

162

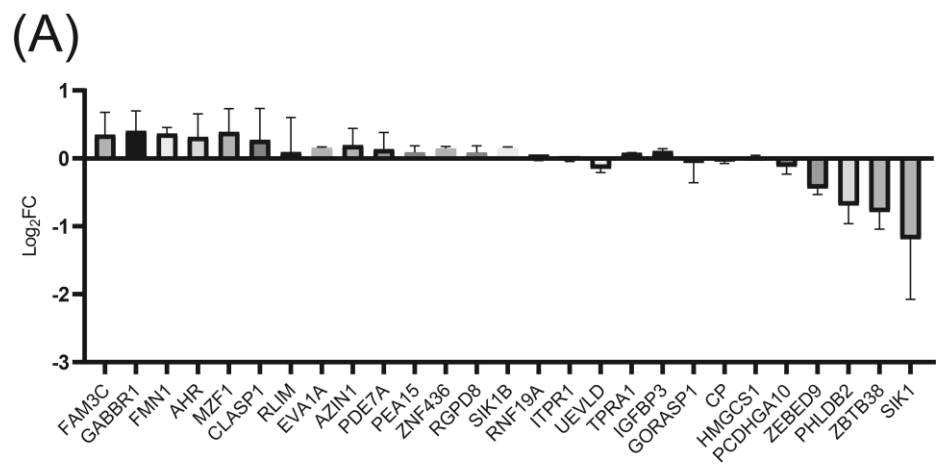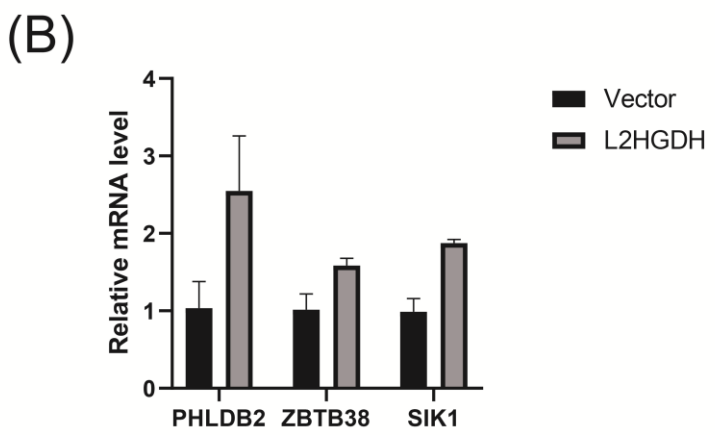

163  
164  
165  
166  
167  
168  
169  
170  
171  
172  
173  
174  
175  
176  
177  
178  
179  
180  
181  
182  
183  
184  
185

**Fig S2**

(A) In 786-O cells, the mRNA level of DEGs was confirmed via qPCR. The data was shown with the Log<sub>2</sub>FC (fold change). SIK1, ZBTB38 and PHLDB2 were the most down-regulated genes.

(B) In 786-O cells, PHLDB2, ZBTB38, SIK1 relative mRNA level increased after L2HGDH plasmid transfection.

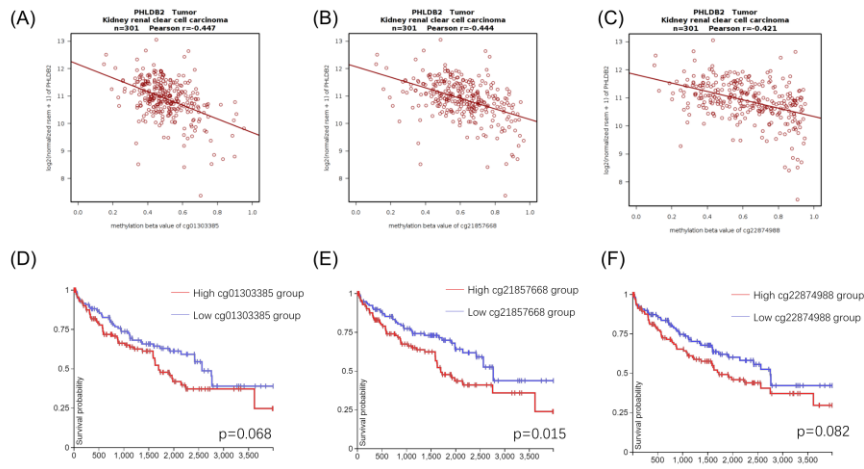

187  
 188  
 189  
 190  
 191  
 192  
 193  
 194  
 195  
 196  
 197  
 198  
 199  
 200  
 201  
 202  
 203  
 204  
 205  
 206  
 207  
 208  
 209  
 210  
 211  
 212  
 213  
 214  
 215  
 216

**Figure S3**

**Correlation of methylation with PHLDB2 expression and OS of RCC.**

(A, B, C) Pearson correlation of cg01303385, cg21857668 and cg22874988 with PHLDB2 expression.  
 (D) Kaplan-Meier analysis of overall survival (OS) in RCC patients with cg01303385 level (p=0.068).  
 (E) Kaplan-Meier analysis of OS in RCC patients with cg21857668 level (p=0.015). (F) Kaplan-Meier analysis of OS in RCC patients with cg22874988 level (p=0.082)



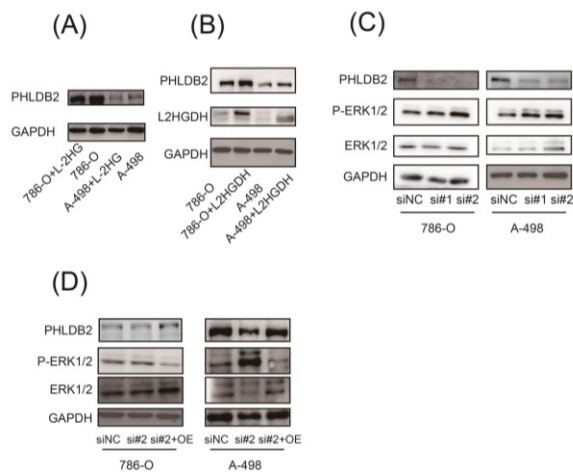

218

219

**Fig S4**

221 (A) Western blot analysis to compare the PHLDB2 expression for 786-O and A-498 cells after  
 222 L-2HG treatment.

223 (B) Western blot analysis to compare the PHLDB2 expression for 786-O, 786-O+L2HGDH  
 224 transfection, A-498, A-498+L2HGDH transfection.

225 (C) Western blot analysis to compare the ERK1/2 phosphorylation for siNC, siPHDB2#1,  
 226 siPHDB2#2 in 786-O and A-498 cells.

227 (D) Western blot analysis to compare the ERK1/2 phosphorylation for siNC, siPHDB2#2,  
 228 siPHDB2#2+ OE PHLDB2 in 786-O and A-498 cells.

229

230

231

232

233

234

235
